# Supplementary material for: Intrinsically strained noble metal-free oxynitrides for solar photoreduction of CO2
Source: Royal Society of Chemistry journal article supplement (doi:10.1039/c9dt01986c), 2019-01-01
Supplement: c9dt01986c1.pdf [file c9dt01986c1.pdf]

**Electronic Supplementary Information for:**

**Intrinsically Strained Noble Metal-Free Oxynitrides for Solar Photoreduction of CO<sub>2</sub>**

Debtanu Maiti<sup>1,§</sup>, Anne J. Meier<sup>1,2,§</sup>, Johnnie Cairns<sup>1</sup>, Swetha Ramani<sup>3</sup>, Karen Martinet<sup>1</sup>,  
John N. Kuhn<sup>1,3,\*</sup>, Venkat R. Bhethanabotla<sup>1,3,\*</sup>

<sup>1</sup>Department of Chemical & Biomolecular Engineering, University of South Florida, Tampa, FL – 33620, USA.

<sup>2</sup>Laboratory - Development and Testing Division, NASA Kennedy Space Center, FL – 32899. Mail Stop NE-L3, USA.

<sup>3</sup>Department of Chemistry, University of South Florida, Tampa, FL-33620, USA.

Table S1: Sample nomenclature

| <b>Zn:Ga precursor concentration</b> | <b>LDH nomenclature</b> | <b>Nitriding time (min)</b> | <b>Oxynitride nomenclature</b> |
|--------------------------------------|-------------------------|-----------------------------|--------------------------------|
| 1:1                                  | 1-LDH                   | 10                          | 1-10                           |
|                                      |                         | 20                          | 1-20                           |
|                                      |                         | 30                          | 1-30                           |
| 2:1                                  | 2-LDH                   | 10                          | 2-10                           |
|                                      |                         | 20                          | 2-20                           |
|                                      |                         | 30                          | 2-30                           |
| 3:1                                  | 3-LDH                   | 10                          | 3-10                           |
|                                      |                         | 20                          | 3-20                           |
|                                      |                         | 30                          | 3-30                           |

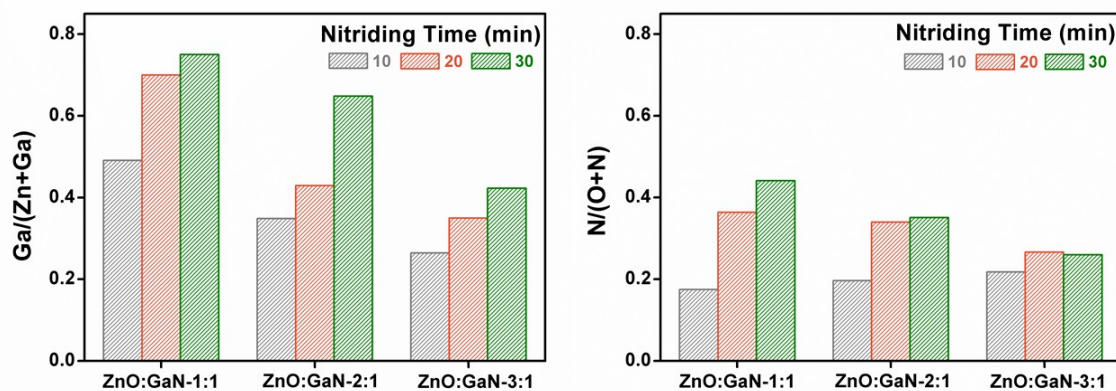

Figure S1: Elemental composition evolution (zinc volatilization and nitrogen incorporation) of the oxynitrides during nitriding time.

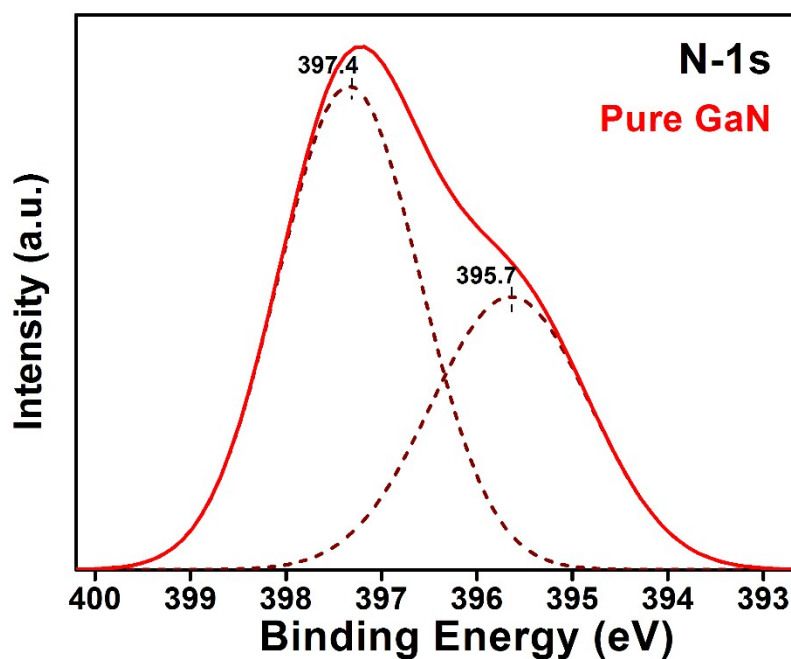

Figure S2:  $\text{N-1s}$  spectrum for pure GaN sample deconvoluted into Ga-N peak (397.4 eV) and an Auger peak (395.7 eV)

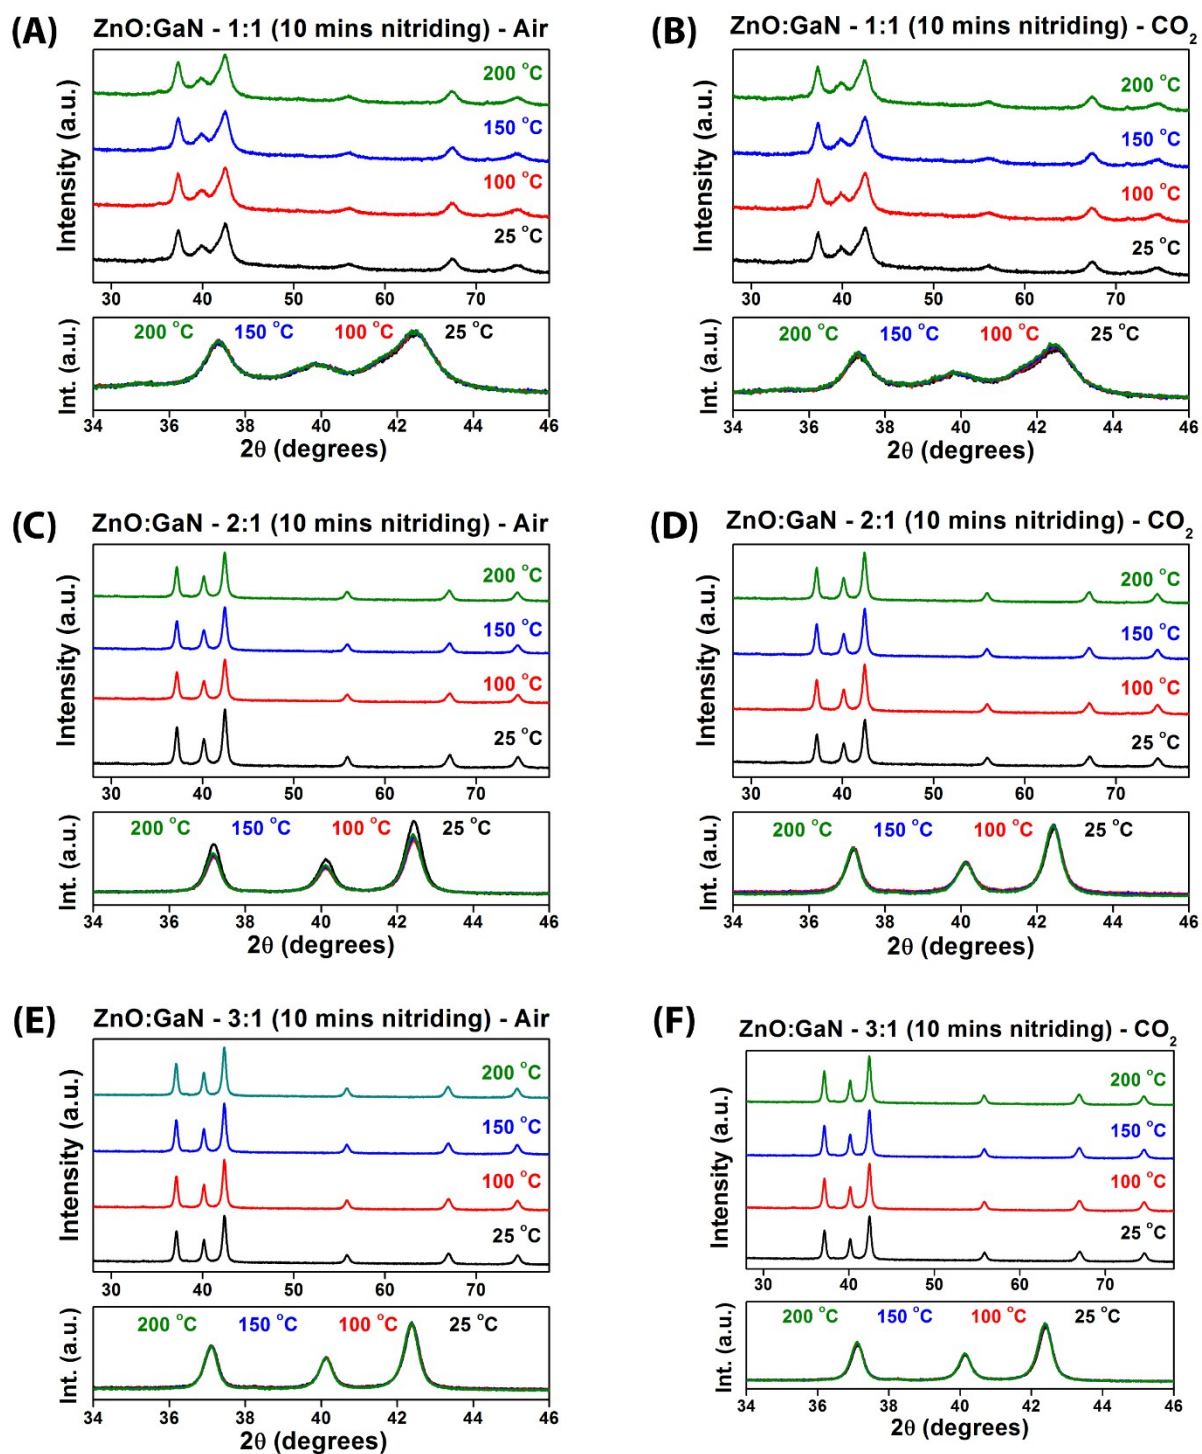

Figure S3 (A-F): Crystalline stability of the samples probed via in-situ XRD under CO<sub>2</sub> and air.

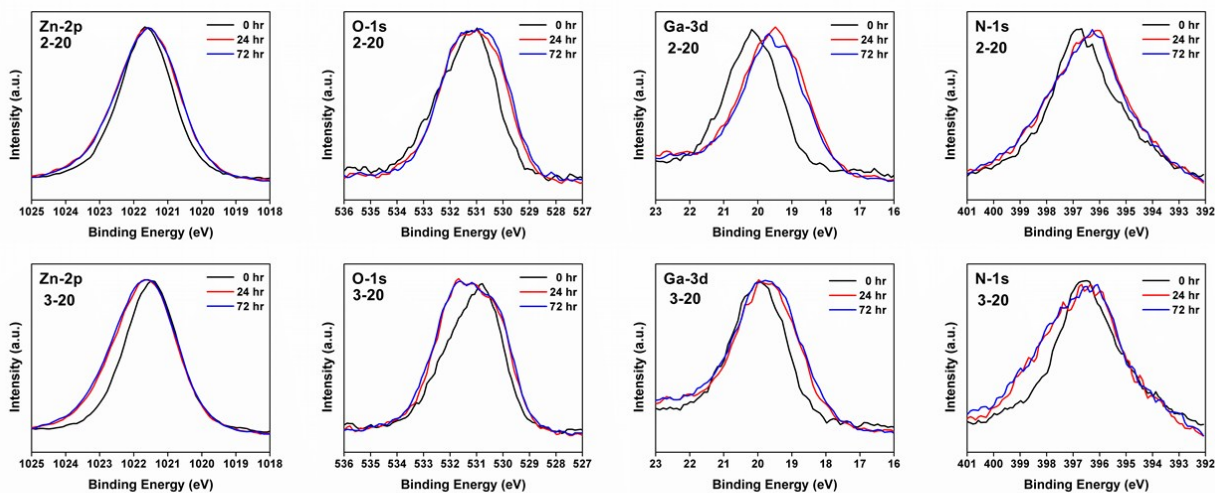

Figure S4: Zn-2*p*, O-1*s*, Ga-3*d* and N-1*s* spectra of oxynitride samples (ZnO:GaN = 2:1 and 3:1; nitrided for 20 min) treated under UV-A (F15T8 bulbs at 75 W/m<sup>2</sup>) light up to 72 hours.
